# Supplementary material for: Prior fluid and electrolyte imbalance is associated with COVID-19 mortality
Source: Commun Med (Lond). 2021 Nov 25;1:51. doi: 10.1038/s43856-021-00051-x (PMC9053234; doi:10.1038/s43856-021-00051-x)
Supplement: Supplementary file 3 — Supplementary Data 2 [file 43856_2021_51_MOESM3_ESM.xlsx]

## Sheet: LABS TEST_NAMES
2019 CORONAVIRUS SARS-COV-2 ID, NP
2019 Coronavirus SARS-CoV-2
2019 Coronavirus SARS-CoV-2 Interp
2019 NOVEL CORONAVIRUS, NP
2019 novel Coronavirus NAAT
2019 novel Coronavirus NAAT Interp
2019 novel Coronavirus PCR
2019 novel Coronavirus PCR Source
COMMENT, SARS COV-2 RNA, RT PCR
CORONAVIRUS COVID-19 NP+OP SWB
CORONAVIRUS COVID-19 RT-PCR OR
CORONAVIRUS SARS-COV-2 RT-PCR (RESPIRATORY)
CORONAVIRUS SARS-COV2 PCR
CORONAVIRUS SARS-COV2 PCR QL
COVID 19
COVID 19 RESULT
COVID 19 RESULT NP
COVID 19 RESULT NP EXT
COVID 19 RESULT OP
COVID 19 SO
COVID 19 SOURCE
COVID 19 SOURCE NP
COVID 19 SOURCE OP
COVID 19 SPECIMEN SOURCE
COVID-19
COVID-19 COMMENT
COVID-19 CONVALESCENT PLASMA DONOR - IMMUNITY SCREENING (DOH)
COVID-19 CONVALESCENT PLASMA DONOR - QUALITATIVE PCR SCREENING (DOH)
COVID-19 NAA REF LAB
COVID-19 PCR (REPORT)
COVID-19 PCR, Qualitative.
COVID-19 SMIH
COVID-19 SOURCE
COVID-19 Source
COVID-19 URGENT CARE
COVID-19 VIRUS
COVID19
COVID19 Eval Order
COVID19 IN-HOUSE
COVID19 NAA
COVID19 PATIENT SYMPTOMATIC?
COVID19 PCR
COVID19 SO SARS-COV-2 PCR I
COVID19 Screen Source
COVID19 Screen Specimen
COVID19, SARS-COV-2
COVID19,SARS-CoV-2
COVID19-PCR
COVID19-RML
COVID19-SOURCE
Coronavirus (COVID-19)(PCR)
EXT COVID-19
EXT-DOH SARS-COV-2 RRTPCR
Novel Coronavirus (2019 nCoV)
Novel Coronavirus 2019
Novel Coronavirus 2019 nCoV
OTHER SARS-COV-2 SOURCE
SARS CORONAVIRUS 2 RNA
SARS COV 2
SARS COV 2 PATIENT
SARS COV 2 RNA
SARS COV 2 RNA, NP
SARS COV 2 RNA, RT PCR
SARS COV-2 INTERPRETATION
SARS COV-2, PCR
SARS CoV 2 RNA
SARS CoV 2 RNA, RT PCR
SARS coronavirus 2 RNA (COVID-19).respiratory
SARS coronavirus 2 RNA (COVID-19).unspecified specimen
SARS coronavirus RNA
SARS-COV-2
SARS-COV-2 PCR
SARS-COV-2 SOURCE
SARS-COV-2 BY PCR EXT
SARS-COV-2 EXT
SARS-COV-2 INTERP
SARS-COV-2 NAA
SARS-COV-2 PCR
SARS-COV-2 PCR EXT
SARS-COV-2 PCRI
SARS-COV-2 RNA
SARS-COV-2 RNA QL PCR
SARS-COV-2 RNA RESP QL NAA+PROBE
SARS-COV-2 RNA SOURCE
SARS-COV-2 RNA SYMPTOMATIC
SARS-COV-2 RNA:
SARS-COV-2 SOURCE
SARS-COV-2 SPECIMEN SOURCE
SARS-COV-2 TEST PENDING
SARS-COV-2, NAA
SARS-COV-2, NAA EXT
SARS-COV-2, NAA, -LCP
SARS-COV-2, NAA, SOURCE-LCP
SARS-COV2 PCR
SARS-CoV-2
SARS-CoV-2 (COVID-19) - Overall Result
SARS-CoV-2 Interpretation
SARS-CoV-2 RNA
SARS-CoV-2 RNA:
SARS-CoV-2 SOURCE
SARS-CoV-2 Source
STATE DEPT HEALTH COVID-19

## Sheet: LABS TEST_RESULT
TEST_RESULT	outcome (1=positive; 0=negative; NA=no assignment possible)
positive	1
detected	1
positive for covid19 (sars cov2) by pcr.	1
positive / detected	1
positive for covid19 (sars cov2) by pcr.(*)	1
not detected reference range: not detected (note) the specimen is negative for sars-cov-2, the coronavirus associated with covid-19. a negative result does not rule out the possibility of covid-19 and should not be used as the sole basis for	0
detected, see scanned report	1
detected, see scanned rep	1
presumptive positive for 2019-ncov	1
presumptive pos	1
positive for 2019-ncov	1
pos	1
detected reference range: not detected (note) the specimen is positive for sars-cov-2, the coronavirus associated with covid-19.	1
positive-detected reference range: not detected testing performed by	1
positive-detected	1
presumptive positive	1
detected critical.(*)	1
critical called at 0645 rbv pos rvb@0734 04/10/20	1
positive for covid19 (sars cov2) by pcr	1
positive-detected reference range: not detected	1
detected reference range: not detected (note) => revised: change in test result(s) please disregard previously reported information below: (the information below was originally reported on 04/22/2020 at 2:38 pm) result	1
detected critical.	1
detected or positive	1
and bal fluid. please submit both an np and op swab in the same collection tube, if possible. sampling and testing a single anatomic site may lead to false-negative results. this test was developed and its performance characteristics wer	NA
positive-detected reference range: not detected (note)	1
detected - see scanned report	1
detectedsars cov 2 rna	1
presumptive pos. for 2019-ncov	1
presumptive positive (tracheal aspirate)	1
detected rbv covid detected 04/26/20@23:16	1
possible mislabel. office is recollecting specimen for repeat testing	NA
detected reference range: not detected (note) => revised: change in test result(s) please disregard previously reported information below: (the information below was originally reported on 04/23/2020 at 4:31 pm) result	1
positive for 201 <see note>	NA
positive for ebv nuclear antigen antibodies	NA
p), and bal fluid. please submit both an np and op swab in the same collection tube, if possible. sampling and testing a single anatomic site may lead to false-negative results. this test was developed and its performance characteristics	NA
positive for covid 19) sars cov2) by pcr	1
detected (critical)	1
presumptive posi <see note>	1
detected this test is used to detect sars-cov-2, the virus responsible for cornoavirus disease 2019 (covid-19), by means of nucleic acid amplification. acceptable specimens include nasopharyngeal swabs (np), oropharyngeal swabs (op),	1
positive sars-cov-2	1
detected abnormal (*)	1
positive-detected reference range: not detected (note) test performed at:	1
positive for covid-19 (sars-cov2) by pcr	1
cancelled-cancelled by submitterabn command rbv pos sars cov 2 16:19 4/24/20	NA
no exposure	NA
rbv cov det 05/01/2020 1324	1
detected (note) the specimen is presumptive positive for sars-cov-2, the coronavirus associated with covid-19. confirmatory testing may be conducted if indicated for epidemiological purposes or clinical management. the specimen is positive f	1
positive , ~break , ~break	1
* positive	1
detected critical	1
positive for covid 19	1
detected reference range: not detected (note) sars-cov-2 virus rt-pcr does not detect the presence of sars-cov-2 virus in this patient's specimen. clinical correlation with patient history, physical examination, and any other diagnostic testi	1
rn rbv covid pos 041620 @ 2321	1
non-exposure	NA
detected critical result called (note) all target results were valid. results for sars-cov-2 rna is detected.	1
a false negative pregnancy test is possible if the urine is dilute. if pregnancy remains a serious clinical consideration, recommend serum pregnancy test or repeat testing on first morning urine, as confirmation.	NA
presumptive postive,not confirmed by repeat testing due to qns. please submit new specimen for retes	1
negative	0
not detected	0
footnote	NA
not-detected	0
nasopharyngeal	NA
pending	NA
nasopharyngeal swab	NA
report to follow.	NA
negative for covid19 (sars cov2) by pcr.	0
NA	NA
np	0
refer to result for covid 19 when completed.	NA
sars-cov-2 target nucleic acids are not detected.	0
none detected	0
np swab	0
negative-not detected reference range: not detected	0
sent to	NA
report to follow	NA
see below	NA
nasal	NA
patient management decisions.	NA
ops	NA
neg	0
cpl report to follow	NA
reflexed to pcr assay	NA
oropharynx	NA
sent to rml	NA
presumptive negative	0
undetected	0
see separate report	NA
request credited.	NA
specimen leaked in transport.	NA
nasal swab	NA
note:	NA
non-reactive	NA
other symptomatic pt	NA
cancelled by lab	NA
nasopharyneal swab	NA
dry swab	NA
oropharyngeal	NA
np/op swab	NA
nps	0
negative-not detected	0
please see hardcopy/scanned lab report	NA
op	NA
ram	NA
unknown	NA
sars-cov-2 interp	NA
sars cov 2 (agent of covid 19) not detected by pcr.	0
negative / not detected	0
notdet	0
swab	NA
priority 2	NA
covid 19 test	NA
not applicable	NA
not detected - see scanned report	0
npg	0
nasopharyngeal and orophararyngeal swabs	NA
test not performed	NA
tnp	0
ordered	NA
(note)	NA
mixed pattern, diffuse/speckled.	NA
negative-not detected reference range: not detected testing performed by	0
not-detected test performed at	0
see separate report. scanned results can also be viewed in epic.	NA
nasopharyngeal swab and oropharyngeal swab (m4 viral transport media)	NA
sars-cov-2 not detected	0
indeterminate	NA
inconclusive results	NA
the food and drug administration.	NA
yes	NA
priority 3	NA
nasophayngeal	NA
nasopharynx	NA
nasopahryngeal	NA
tracheal aspirate	NA
nares	NA
identity unclear. specimen labelled incorrectly.	NA
invalid	NA
requisitioning entry error	NA
throat swab	NA
duplicate request	NA
nasopharynx-oropharynx	NA
result_value_not_viewable	NA
cancelled	NA
not detected this test is used to detect sars-cov-2, the virus responsible for cornoavirus disease 2019 (covid-19), by means of nucleic acid amplification. acceptable specimens include nasopharyngeal swabs (np), oropharyngeal swabs (o	0
pt refused testing	NA
not-detected not detected results do not preclude sars cov-2 infection. clinical correlation is required to rule out false negative. sars cov-2 rna viral testing performed using the abbott id now which has been granted emergency use authorization by	0
unable to assay. quantity not sufficient.	NA
not_performed	NA
priority 1	NA
inconclusive	NA
nasophar. swab	NA
sars-cov-2 (agent of covid-19) not detected by pcr	0
see separate report.	NA
no 2019 ncov rna detected.	0
canceled	NA
no detected	0
improper specimen collected for requested test	NA
duplicate lab ordered.	NA
see report	NA
tnp (note) test not performed specimen leaked in transit.	0
trach aspirate	NA
all target results were valid. result for sars-cov-2 rna is not detected.	0
testing to be performed at .	NA
test performed at deaconess regional laboratory	NA
nasopharyngeal swab and oropharyngeal swabs	NA
note	NA
to follow	NA
not given	NA
nasophar	NA
nasopharyngeal oropharyngeal	NA
2019 ncov rna detected.	1
tracheal asp.	NA
all target results were valid. result for sars-cov-2 rna is detected.	NA
na	NA
fever	NA
?	NA
sent to cpl	NA
see scanned	NA
sent cpl	NA
sent to reference lab. see novel coronavirus sars-cov-2 by pcr for order status.	NA
naso	NA
nasopharyngeal/oropharyngeal	NA
nasopharangeal and oropharyngeal swab	NA
negative-not detected reference range: not detected (note) test performed at:	0
bronchalveolar lavage (bal)	NA
nasopharangeal swab	NA
wrong test ordered	NA
only swab sent.	NA
comment	NA
no 2019 ncov rna detected	0
account credited	NA
pharyngeal	NA
nasps	NA
not detected or negative	0
quantity not sufficient	NA
no	NA
nasophryngeal	NA
request credited	NA
see text	NA
being admitted	NA
see note	NA
not detected	0
duplicate	NA
unable to assay. specimen incorrectly identified.	NA
not done	NA
reference range: corneg	0
specimen unacceptable recollect requested	NA
null	NA
negative for covid-19 (sars-cov2) by pcr	0
request cancelled	NA
sample leaked in transit, unable to perform testing	NA
no specimen received	NA
ed	NA
sent to reference lab	NA
invalid result	NA
test ordered incorrectly	NA
see_note	NA
order problem: duplicate order.	NA
see note below	NA
unable to assay. no specimen received.	NA
eady been called to er and cc.	NA
see comment	NA
no specimen received.	NA
nasopharygneal	NA
order problem: improperly requisitioned by lab.	NA
inpatient	NA
phar	NA
in error	NA
n/a	NA
nasal covid 19	1
incorrect test ordered. correct order placed. results to follow.	NA
not dectected	0
reordered to facilitate specimen processing, see separate test, acc. number.	NA
sars-cov-2 (agent of covid-19) detected by pcr	1
presumptive	NA
duplicate order	NA
order_error	NA
specimen received unlabelled.	NA
no specimen at reference lab	NA
nose	NA
nasopoharyngeal	NA
results to be sent directly to ordering provider	NA
indeterm	NA
ngp	NA
covid- retest inpt	NA
please disregard: ordered and reported using wrong ordering provider.	NA
negative for covid-19	0
covid 19	1
tnp:client request	NA
test inadvertently not performed	NA
improper collection, test canceled	NA
sputum	NA
unable to analyze due to inhibitors present in sample	NA
/17	NA
test not performed at physicians request.	NA
right nares	NA
scolex	NA
bronchial washing	NA
disregard	NA
see comments	NA
see for results	NA
sars cov 2 (agent of covid 19) detected by pcr.	1
qns	NA
unlabeled tube received with no swab inside	NA
community	NA
no growth	NA
r nostril	NA
rapid test performed see	NA
test accessioning error, please disregard.	NA
test incorrectly ordered.	NA
cancelled, specimen not collected or received	NA
indeterminate. please collect a new sample for testing.	NA
wrong swab collected	NA
not performed	NA
nars	NA
see image	NA
presumptive neg	0
none det	0
processing problem: specimen broken/spilled.	NA
sars-cov-2 source	NA
unresolved	NA
nasalpharyngeal	NA
nasopharngeal	NA
covid19	1
notdetected	0
tracheal	NA
nasal swab.	NA
normal	NA
dnr	NA
np and op	0
neg presp results r/o covid 19	0
mp	NA
n	NA
pt no show	NA
final	NA
.	NA
request to be done in cepheid instead	NA
covid	NA
test reordered by	NA
3)lack of antibody response to hbv vaccination, or,	NA
specimen source unknown	NA
specimen collected in wrong container type.	NA
sars-cov-2, naa detected	1
2019 ncov rna detected	1
duplicate order, rapid test ordered	NA
wet swab	NA
bal rul	NA
cancelled by clinician	NA
nt swab	NA
pre-op (urgent)	NA
naso pharynx	NA
mps	NA
nasal pharangeal	NA
test not performed (note) test not performed specimen leaked in transit.	NA
this test is not currently approved by the u.s. food and drug administration for in vitro diagnostic testing.	NA
other	NA
nasaopharyngeal swab	NA
reactive	NA
nursing home	NA
see ref lab report	NA
no sputum received.	NA
insufficient quant.	NA
invalid results, wrong patient.	NA
nasel	NA
equivocal	NA
swab from trach	NA
didn't receive a dry swab for screening	NA
for placement	NA
-/+	NA
credited 04142020. ordered t621667 for in house testing.	NA
specimen not received	NA
not detected: see scanned report for more information	0
reordered	NA
add on	NA
unable to assay. specimen improperly collected/handled.	NA
2 4/16/20	NA
critical called @1741	NA
indeterminate due to an inhibitory substance present in the specimen. inhibition confirmed on repeat analysis. if clinically indicated, repeat test.	NA
negative for covid 19	0
sent to reference lab 04/07/20 10:12 final report scanned	NA
ssr	NA
not tested	NA
see scanned image in media manager.	NA
covid-19	1
excovd ordered	NA
disregard results. specimen incorrectly identified.	NA
inconclusive reference range: not detected	NA
negative for covid19 (sars cov2) by pcr	0
reference range: negative for covid19 (sars cov2) by pcr. (*)	0
nasapharyngeal swab	NA
nasopharangeal	NA
nasopharygeal	NA
see scanned report	NA
cancelled-cancelled by submitter	NA
nas	NA
done	NA
nasopharnngeal	NA
nares (nostril) anterior	NA
none detected.	0
pre-op (routine)	NA
nt	NA
rr	NA
will follow	NA
et tube	NA
bluetop swab	NA
swab - nasal	NA
nasopharyngeal.	NA
asympt to snf/rehab	NA
wrong code	NA
nasalpharygeal	NA
no need	NA
sent to reference lab 03/27/20 08:19 final report scanned	NA
tnp (note) test(s) not performed: result test not performed specimen leaked in transit.	0
order error	NA
specimen creditted	NA
nasal wash	NA
nasal covid19	NA
s been validated per emergency use authorization guidance by the u.s. food and drug administration. independent review of this validation by fda is pending. per fda guidance on the emergency use authorization for sars-cov-2 diagnostic testing	NA
excovd order placed per	NA
dryswab	NA
sent to reference lab on 05/04/20 at 10:24	NA
mdh	NA
nasopharnygeal swab	NA
urine	NA
npswab	NA
see scan	NA
negative for covid 19 by pcr	0
non detected	0
nasopharengyl	NA
sent to reference lab 05/15/2020 12:46 reference lab complete. see scanned report. 05/17/2020 13:54	NA
test results are uninterpretable due to an interferring substance	NA
fax results to	NA
sent to reference lab by: on 05/25/20 at 07:38 result scanned into his by: on 05/26/20 at 16:16	NA
nsb	NA
bronchial washings	NA
nasopharygneal swab	NA
non-hca hcw	NA
nasopharygeal swab	NA
not provided specimen source was not provided. please refer to the laboratory test directory for validated specimen source	NA
<np>	NA
entry error	NA
test reordered on another	NA
phone	NA
excovd order placed	NA
8	NA
no speimen received	NA
non-reactivea	NA
specimen rejected. specimen unacceptable, received on dry swab.	NA
wrong tube/specimen type	NA
negative for influenza a by rt pcr	NA
sars-cov-2 inconclusive	NA
pleural fluid	NA
clinical pathology laboratories	NA
no specimen	NA
respiratory specimen	NA
cov det 04/10/2020 1312	1
not further identified .	NA
nasopharynx oropharynx	NA
intermediate	NA
negative for covid19	0
np swab	NA
negative not detected	0
testing performed using the hologic sars-cov-2 real-time rt-pcr assay under an fda emergency use authorization (eua).	NA
npharg	NA
specimen was lost and not tested	NA
unable to obtain valid test result.	NA
broken/spilled in transit	NA
sent to reference lab 05/06/2020 10:34 reference lab complete. see scanned report. 05/07/2020 06:11	NA
3300270967	NA
collection problem: insufficient specimen.	NA
resistant	NA
no spirochetes seen on darkfield	NA
incorrect test ordered.	NA
nasal lab	NA
unable to assay. unable to locate specimen.	NA
duplicate. test credited	NA
wrong_patient	NA
stat	NA
unable to assay. broken/spilled in transit.	NA
test performed at	NA
cancel test ran inhouse	NA
see scanned rep	NA
0	NA
not detetected	0
//	NA
y	NA
nasopharyngeal and oropharyngeal swabs	NA
negative for covid19 (sars cov2 by pcr	0
covid19 not detected.	0
no cells compatible with a lower respiratory tract origin are seen.	NA
invalid results	NA
npg novel coronavirus 2019 sars cov2	NA
np/op	NA
covid 2019	1
cancelled id mismatch	NA
order problem: improperly requisitioned by client.	NA
nasalpharangeal	NA
unable to perform testing due to lost specimen.	NA
forwarded to virology	NA
cleveland report to follow	NA
testing only	NA
covid to state	NA
specimen received in universal transport medium.	NA
none given	NA
negative for covid	NA
blue top swab	NA
sent to reference lab 03/27/20 08:18 final report scanned	NA
nasalpharyngeal swab	NA
changed to excovd per client services	NA
not detected corrected on 04/16 at 1039: previously reported as negative not detected reference range: not detected	0
covid 19-naa not detected	0
nasal swap	NA
sent wrong container type also leaking recollection needed	NA
not detected corrected on 04/16 at 1041: previously reported as negative not detected reference range: not detected	0
bal	NA
see scanned reporrt	NA
65	NA
testing performed using the diasorin molecular simplexa (tm) covid-19 direct kit.	NA
home	NA
not detected .	0
np s	NA
nasopharageal swab	NA
test cancelled	NA
not tested .	NA
specimen rejected	NA
see covid19 for result	NA
not detected reference range: not detected (note) => revised: change in test result(s) please disregard previously reported information below: (the information below was originally reported on 04/23/2020 at 4:31 pm) result	0
performance problem: test not performed.	NA
nasophaynx	NA
no report	NA
throat	NA
np swab bal	NA
test changed to excovid.	NA
negative for 2019-novel coronavirus (2019-ncov) by pcr.	0
non blood	NA
tnp / 200	NA
test canceled by nursing supervisor see new order from icu	NA
ntd	0
nasopharengeal swab	NA
rapid testing will be performed and resulted under	NA
csf lumbar puncture	NA
negative for covid19(sars cov2) by pcr	0
manual diff	NA
notdnot detected	0
sars	NA
other state approved	NA
j22	NA
sent to reference lab on 04/18/20 at 12:32	NA
neg respiratory panel results r/o covid 19	0
normocytic anemia without polychromasia	NA
nasopharyungeal	NA
neg presp r/o covid 19	0
test not performed patient discharged	NA
excovd to be done instead per client services	NA
pharn	NA
negative-not detected reference range: not detected cnt rbv covid 040120 @ 231	0
sent to reference lab on 04/14/20	NA
negative for covid 19 (sars cov2) by pcr	0
covid 19 rapid	NA
no call per procedure.	NA
nasal swabs	NA
nasal swab on ice	NA
see separate reporty	NA
not collected	NA
negative for covid-19 (sars cov2) naa	0
sent to reference lab 05/15/2020 18:37 reference lab complete. see scanned report. 05/18/2020 15:01	NA
not detected reference range: not detected (note) sars-cov-2 virus rt-pcr does not detect the presence of sars-cov-2 virus in this patient's specimen. clinical correlation with patient history, physical examination, and any other diagnostic t	0
sent to reference lab by: on 05/21/20 at 09:28 result scanned into his by: on 05/22/20 at 16:34	NA
nde	0
not det	0
naspharyngeal	NA
specimen rejected. sample was frozen upon receipt.	NA
tnp / 209	NA
'nasal	NA
nphag	NA
nasopharengeal	NA
nasoparyngeal	NA
specimen received in preservative	NA
nasopharyageal swab	NA
cerebrospinal fluid	NA
not analyzed	NA
sent to reference lab 06/05/2020 16:07 reference lab complete. see scanned report. 06/07/2020 06:02	NA
cancel testing per dr	NA
respitory	NA
reference range : not detected	0
patient swab	NA
bronchial aspirate	NA
result scanned	NA
test was cancelled, no testing perfomed on this order	NA
asmypt staff r/o exp	NA
sent to reference lab by: on 05/15/20 at 13:14 result scanned into his by: on 05/19/20 at 16:09	NA
test not sent to srl	NA
sent to reference lab 04/07/20 10:12 final result phoned	NA
invalid, see scanned report	NA
inclusions	NA
no malaria, microfilariae, trypanosomes or babesia seen	NA
reference range: not detected	0
or sars-cov-2, the coronavirus associated with covid-19.	1
pharengeal swab	NA
sent to reference lab 05/15/2020 14:35 reference lab complete. see scanned report. 05/17/2020 13:48	NA
negative for covid 19 (sars cov2)	0
non-detected	0
not needed	NA
.swab	NA
sent to reference lab 06/14/2020 10:33 reference lab complete. see scanned report. 06/14/2020 15:55	NA
testing performed using the uw sars-cov-2 real-time rt-pcr assay. this laboratory developed test has been validated in a clia high complexity clinical laboratory under a state emergency use authorization (eua).	NA
transtracheal aspirate	NA
test not performed.	NA
patient nares	NA
notified that specimen leaked in transport and notified dr	NA
released in error.	NA
in process	NA
order changed to excovd	NA
unable to perform specimen leaked in transit will recollect	NA
final report scanned	NA
specimen leaked	NA
nasopharayngeal swab	NA
covid 19 pcr (nasopharynx)	1
nul	NA
t 04/10/2020 1320	NA
tnp/124	NA
sent to reference lab 06/25/2020 10:06 reference lab complete. see scanned report. 06/25/2020 19:29	NA
please disregard. ordered & reported on wrong patient.	NA
quest code 39433 sars cov2	NA
nasopharyngel swab	NA
nasopharnyx	NA
nnp swab	NA
not detected corrected on 04/16 at 1040: previously reported as negative not detected reference range: not detected	0
clear	NA
sent to cpl report to follow	NA
sent to reference lab by: on 05/24/20 at 13:32 result scanned into his by: on 05/26/20 at 16:49	NA
wrong account	NA
entered in error	NA
nasalpharyngeal and oralpharyngeal swabs	NA
tracheal aspira	NA
sent to reference lab on 04/10/20 at 12:01	NA
nasopheryngeal	NA
ordered in error by lab	NA
collection problem: specimen received unlabeled or mislabeled. client/nursing unit notified to reorder and recollect as appropriate.	NA
see scanned document	NA
test not performed. sent to quest for testing	NA
nasopharyneal	NA
specimen rejected by marshfield labs due to labeling error	NA
cervix	NA
sent to reference lab by: on 04/27/20 result scanned into his by: on 04/28/20 at 15:15	NA
(note) cancelled by submitter dnr	NA
