# Supplementary material for: Prior fluid and electrolyte imbalance is associated with COVID-19 mortality
Source: Commun Med (Lond). 2021 Nov 25;1:51. doi: 10.1038/s43856-021-00051-x (PMC9053234; doi:10.1038/s43856-021-00051-x)
Supplement: Supplementary file 6 — Supplementary Data 5 [file 43856_2021_51_MOESM6_ESM.xlsx]

## Sheet: Sheet1
model	C-index1	AUC-5days2	AUC-10days3	AUC-20days4	AUC-30days5	AUC-60days6
joined model	0.853 (0.003)	86.26	86.99	86.66	86.09	86.1
comorbidity model	0.841 (0.003)	85.33	85.88	85.56	85	84.84
labs and vitals model	0.851 (0.003)	86.34	86.87	86.5	85.88	85.74
	1Concordance index with standard error
	2Area under the curve for 5-day survival
	3Area under the curve for 10-day survival
	4Area under the curve for 20-day survival
	5Area under the curve for 30-day survival
	6Area under the curve for 60-day survival
