# Supplementary material for: Prior fluid and electrolyte imbalance is associated with COVID-19 mortality
Source: Commun Med (Lond). 2021 Nov 25;1:51. doi: 10.1038/s43856-021-00051-x (PMC9053234; doi:10.1038/s43856-021-00051-x)
Supplement: Supplementary file 7 — Supplementary Data 6 [file 43856_2021_51_MOESM7_ESM.xlsx]

## Sheet: candOut.Renal.byRelevance
		OR_2SD	P			OR_2SD	P			OR_2SD	P
primary variable:	Hypertension	4.89991	7.25703e-193		DBP	0.428504	2.47611e-130		Renal	3.07345	0
removal by:	age	1.68086	1.85007e-20		age	0.749645	1.77524e-13		age	1.65034	1.56436e-70
further removal by:	GENDER	1.62895	2.28089e-18		GENDER	0.722908	1.29565e-16		GENDER	1.59732	9.13765e-62
further removal by:	Albumin	1.56273	1.22535e-15		Albumin	0.858962	0.000132759		Albumin	1.41625	9.9502e-34
…	Red_cell_distribution_width	1.49764	4.3896e-13		Red_cell_distribution_width	0.902354	0.00988171		Red_cell_distribution_width	1.34074	4.54679e-24
	INSURANCE_Uninsured	1.50273	2.71812e-13		INSURANCE_Uninsured	0.89851	0.00738309		INSURANCE_Uninsured	1.34783	7.29017e-25
	Blood_urea_nitrogen	1.43079	1.48264e-10		Blood_urea_nitrogen	0.954298	0.244573		Blood_urea_nitrogen	1.2044	8.45525e-09
	Respiratory_rate	1.41903	3.8308e-10						Respiratory_rate	1.19296	4.32379e-08
	FPEI	1.28205	1.30665e-05						FPEI	1.09927	0.00431754
	South_South_Atl_West_South_Crl	1.28122	1.38842e-05
	African ethnicity	1.24154	0.000157363
	Northeast_Middle_Atlantic	1.23298	0.00025642
	Dementia	1.23751	0.00020542
	Hemoglobin_A1C	1.17776	0.0045237
